# Supplementary material for: Homogenization of electric field distribution facilitating the Zn anode reversibility
Source: Royal Society of Chemistry journal article supplement (doi:10.1039/d2cc05532e), 2022-01-01
Supplement: d2cc05532e1.pdf [file d2cc05532e1.pdf]

## Supporting Information

### Homogenization of electric field distribution facilitating the Zn anode reversibility

Han Tang,<sup>a</sup> Huadong Liang,<sup>a</sup> Runmin Jia,<sup>a</sup> Yu Liu,<sup>b,c</sup> Huibiao Chen,<sup>a</sup> Hongyu Luo,<sup>a</sup> Wei Yang,<sup>b</sup> Jian Wang,<sup>b</sup>

Mengjun Zhou,<sup>\*b</sup> Ping Luo<sup>\*a</sup> and Qinyou An<sup>\*b</sup>

<sup>a</sup> Hubei Provincial Key Laboratory of Green Materials for Light Industry, School of Materials and Chemical Engineering, Hubei University of Technology, Wuhan 430068, China.

<sup>b</sup> State Key Laboratory of Advanced Technology for Materials Synthesis and Processing, School Material Science and Engineering, Wuhan University of Technology, Wuhan 430070, China.

<sup>c</sup> Department of Materials Science and Engineering, National University of Singapore, Singapore, 117574 Singapore

E-mail: zhoumj@whut.edu.cn, luoping@hbut.edu.cn, anqinyou86@whut.edu.cn

### Experimental section

#### P-Zn Fabrication.

B-Zn was treated by sandpaper (800- and 1500-mesh), using commercial Zn foil (thickness: ~200 μm, purity: 99.9 %) as the starting material. B-Zn exhibited a metallic luster after passivation-layer removal. Subsequently, the treated B-Zn was rinsed repeatedly with ethanol and deionized water. Finally, the obtained P-Zn was dried by Ar blowing and deposited in an Ar-filled glove box before being used as the anode.

#### SP-Zn Fabrication.

P-Zn was polished by a nylon cloth using a polishing machine. An Al<sub>2</sub>O<sub>3</sub>-based polishing paste and deionized water were added during the treatment process; the polishing process continued for 180 s. The treated SP-Zn was rinsed

repetitively with ethanol and deionized water, dried by Ar blowing, and deposited in an Ar-filled glove box before use as the anode.

## Characterization.

A Bruker D8 Advance X-ray diffractometer with a non-monochromated Cu-K $\alpha$  X-ray source was used for X-ray diffraction (XRD). The morphology and microstructure of the three types of Zn electrodes were characterized using a JEOL JSM-7100F field-emission scanning electron microscope (SEM) and a Leica DM 6000 DigitalMicroscope.

## Electrochemical Measurements.

Three types of Zn foil were cut into disks ( $\Phi=14$  mm) for electrochemical characterization. B-Zn || B-Zn, P-Zn || P-Zn, and SP-Zn || SP-Zn symmetrical cells were assembled using a 2032-type coin cell configuration. GFD glass fibers ( $\Phi=16$  mm) and ZnSO $_4$  (2 M) were used as the separator and aqueous electrolyte, respectively. A multichannel battery testing system (LAND) was used for the electrochemical plating/stripping measurements of the symmetrical cells. An electrochemical analyzer (CHI 760e) was used to record the electrochemical impedance spectrum (EIS) results (using a frequency range of 100 kHz to 0.01 Hz and an AC voltage of 5 mV).

## Simulation of the Electric Field Contribution

In this work, in order to better know the effect of electrode microstructure on electrical properties, a two-dimensional model of 100x60 $\mu$ m was established by COMSOL Multiphysics to obtain the local electric field and current density distribution of different electrode microstructures. The local electric field  $E$  and current density  $J$  in the electrolyte follow Gauss'law and continuity equation:

$$\nabla \cdot J = \frac{\partial \rho}{\partial t} . \quad (1)$$

$$J = \sigma E . \quad (2)$$

$$E = -\nabla \phi . \quad (3)$$

where  $\rho$ ,  $\sigma$ , and  $\phi$  represent the space charge density, the electrical conductivity and electric potential, respectively. Here, the electrical conductivity of the electrode and electrolyte were set to  $1.7 \times 10^7$  S/m and 5 S/m, respectively. And the overpotential of 0.03  $\mu$ V was employed as voltage excitation between the anode side and the electrolyte side.

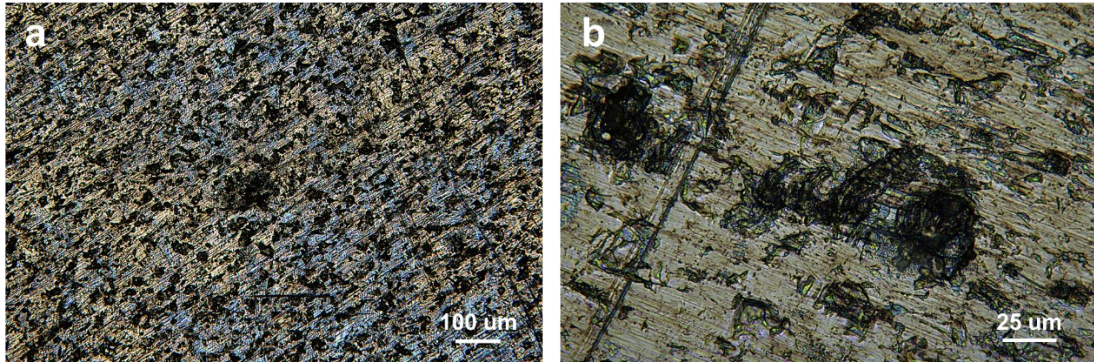

**Fig. S1.** Metallographical images of B-Zn.

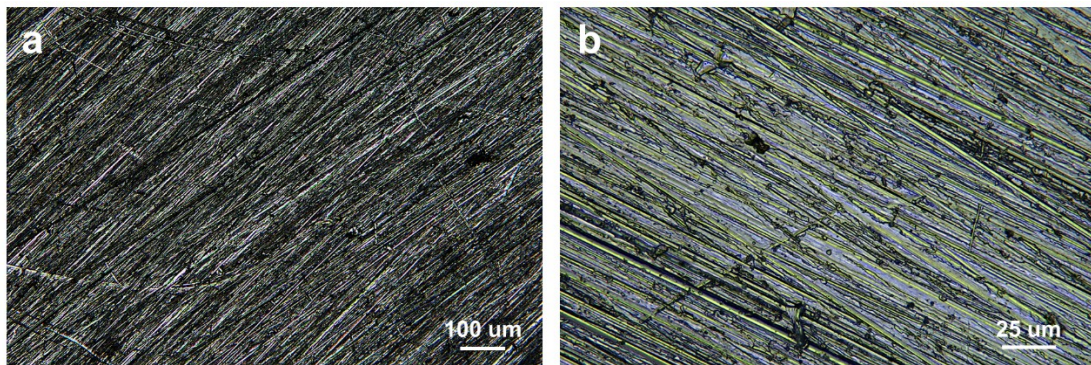

**Fig. S2.** Metallographical images of P-Zn.

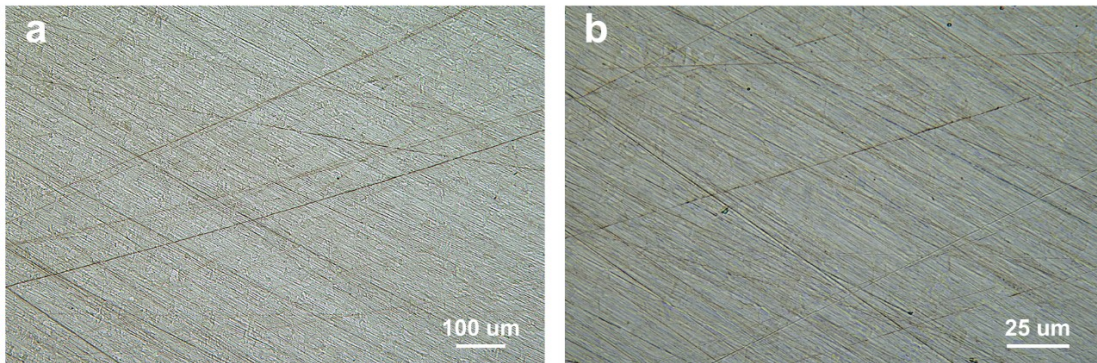

**Fig. S3.** Metallographical images of SP-Zn.

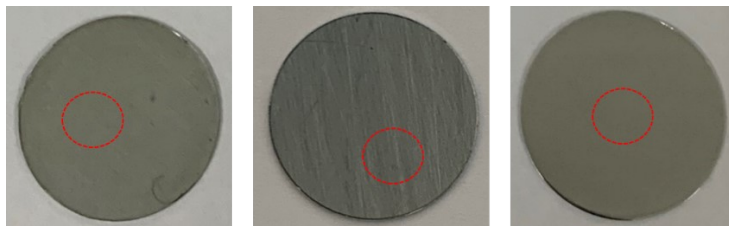

**Fig. S4.** The amplified position of electron microscope on B-Zn, P-Zn and SP-Zn in Fig. 1.

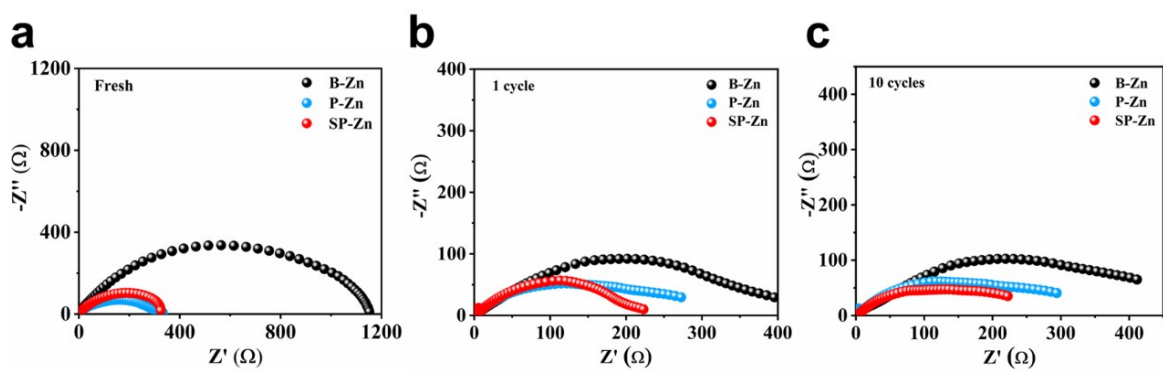

Fig. S5. EIS of B-Zn, P-Zn, SP-Zn at (a) initial, (b) 1st and (c) 10th cycles.

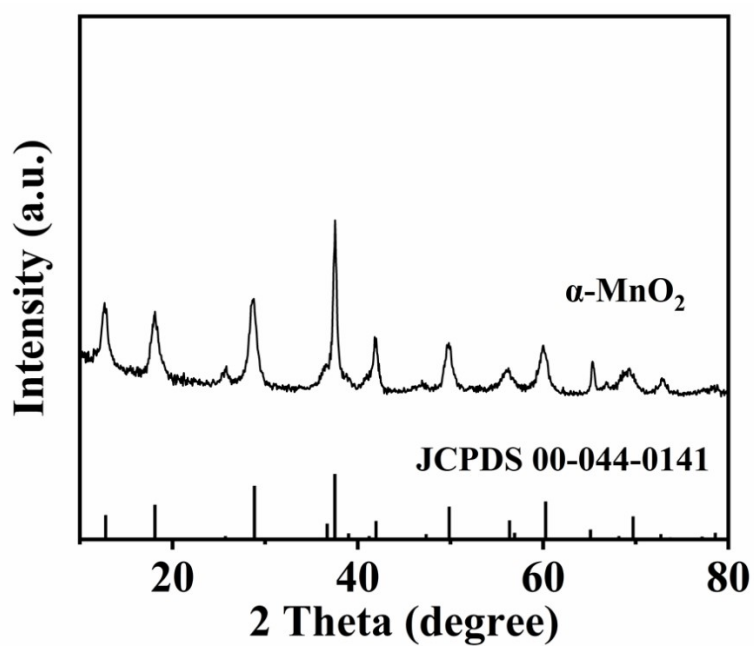

Fig. S6. XRD pattern of  $\alpha$ - $\text{MnO}_2$

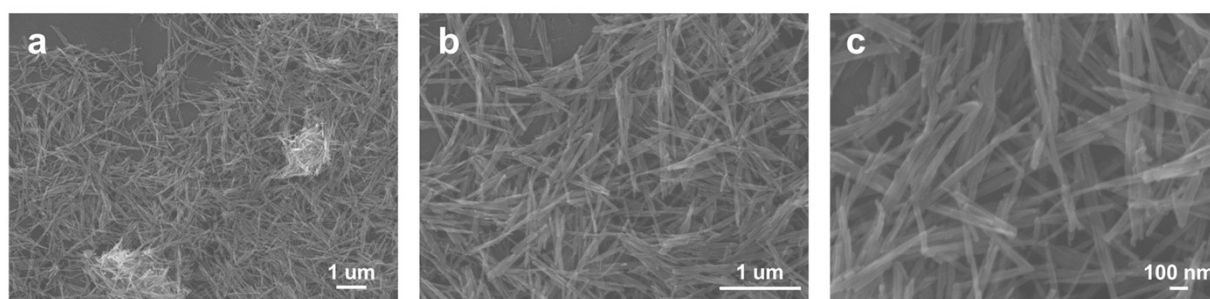

Fig. S7. SEM images of  $\alpha$ - $\text{MnO}_2$

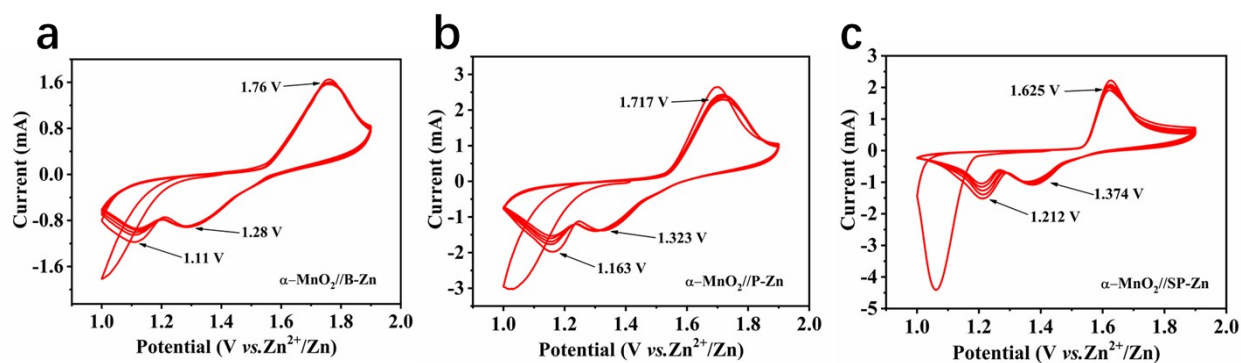

**Fig. S8.** The CV curves of (a)  $\alpha$ - $\text{MnO}_2$ //B-Zn, (b)  $\alpha$ - $\text{MnO}_2$ //P-Zn and (c)  $\alpha$ - $\text{MnO}_2$ //SP-Zn at the scan rate of  $1 \text{ mV s}^{-1}$ ;

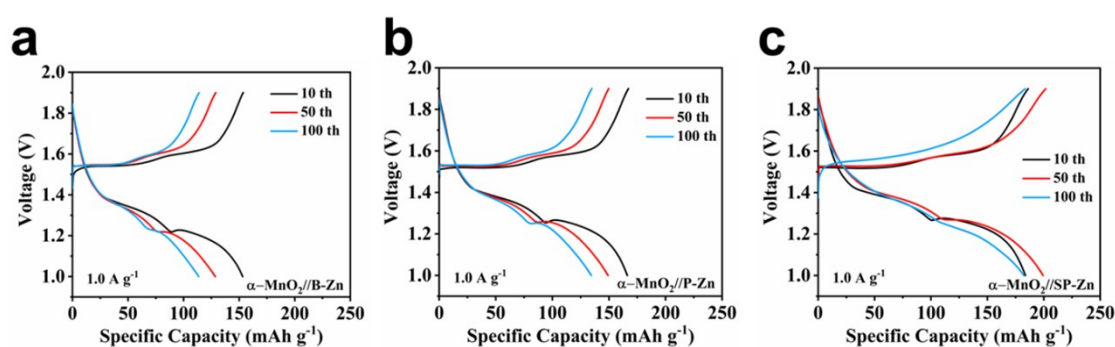

**Fig. S9.** Discharge and charge curves of (a)  $\alpha$ - $\text{MnO}_2$ //B-Zn, (b)  $\alpha$ - $\text{MnO}_2$ //P-Zn and (c)  $\alpha$ - $\text{MnO}_2$ //SP-Zn at 10th, 50th and 100th cycles.

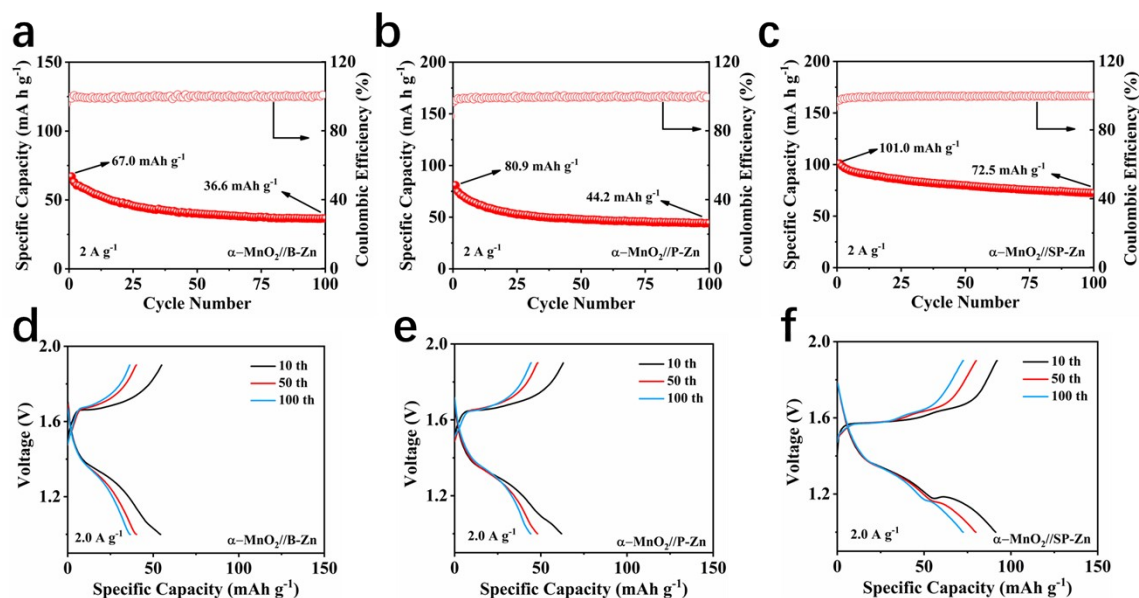

**Fig. S10.** The cycling performance and discharge and charge curves of (a, d)  $\alpha$ - $\text{MnO}_2$ //B-Zn, (b, e)  $\alpha$ - $\text{MnO}_2$ //P-Zn and (c, f)  $\alpha$ - $\text{MnO}_2$ //SP-Zn at a current density of  $2 \text{ A g}^{-1}$ .

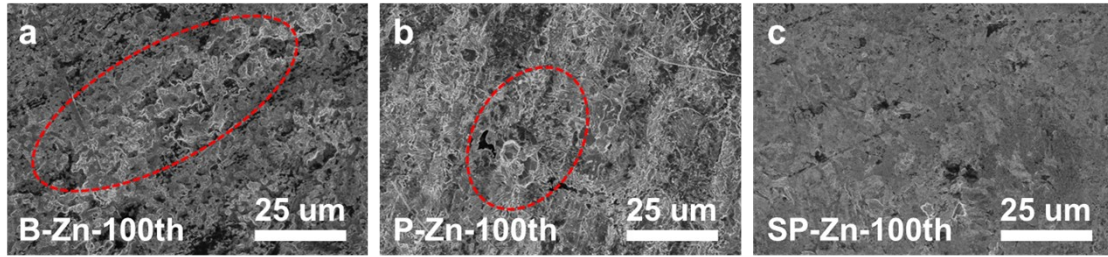

**Fig. S11.** SEM images of (a) B-Zn, (b) P-Zn and (c) SP-Zn in full cells ( $\alpha$ -MnO<sub>2</sub> as cathode material) after 100 cycles.

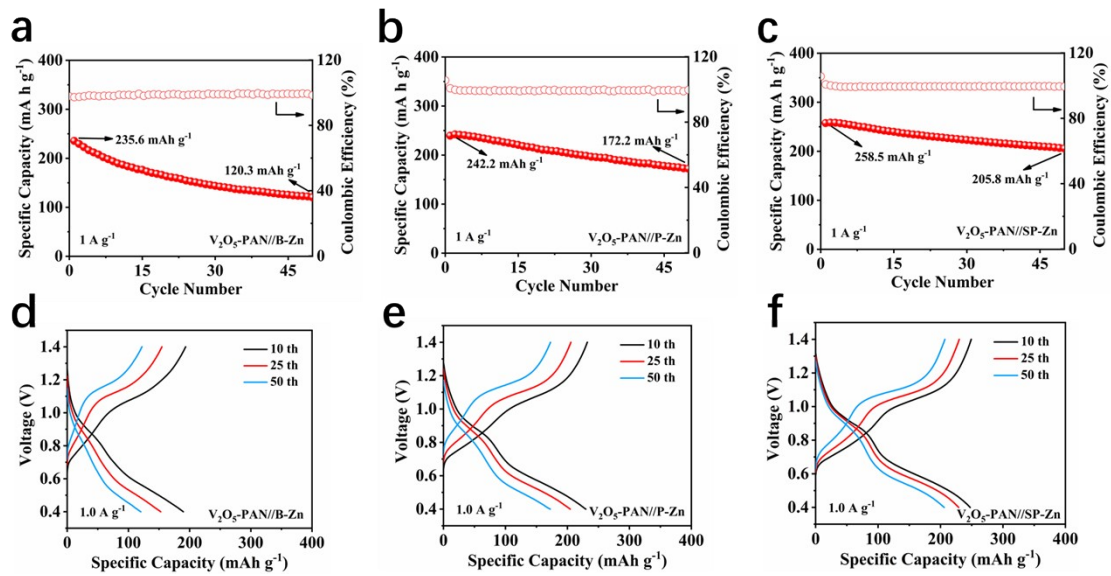

**Fig. S12.** The cycling performance and discharge and charge curves of (a, d) V<sub>2</sub>O<sub>5</sub>-PAN//B-Zn, (b, e) V<sub>2</sub>O<sub>5</sub>-PAN//P-Zn and (c, f) V<sub>2</sub>O<sub>5</sub>-PAN//SP-Zn at a current density of 1 A g<sup>-1</sup>.

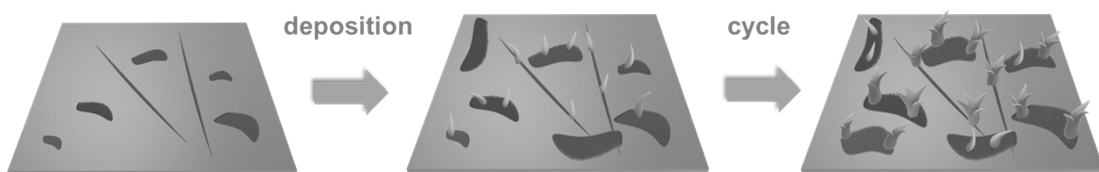

**Fig. S13.** The schematic diagram of uneven rupture of oxide film
